# Supplementary material for: Antimicrobial resistance- and pathogen patterns in the fecal microbiota of sows and their offspring in German commercial pig farms
Source: PubMed Central journal article supplement (PMC10449214; doi:10.1371/journal.pone.0290554), 2023-08-24
Supplement: pone.0290554.s002.pdf [file pone.0290554.s002.pdf]

# Supporting information

## 1 Figures

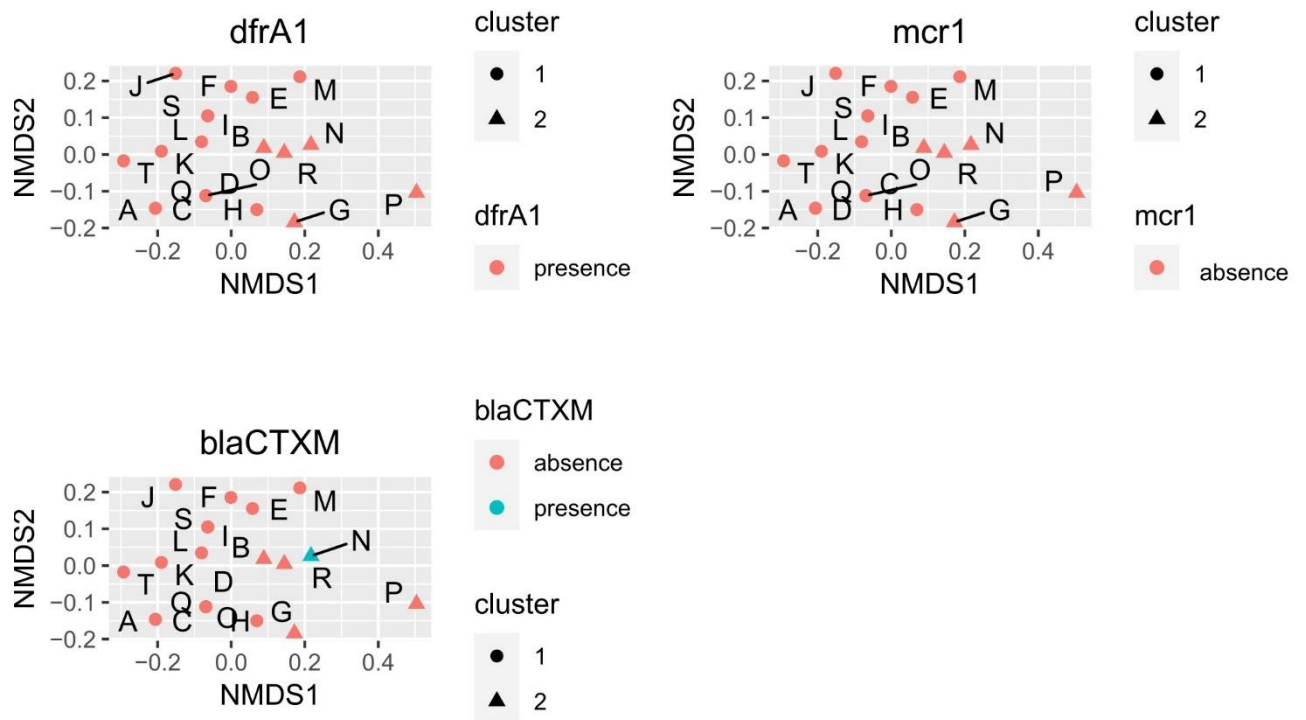

**S1 Fig. Distribution of trimethoprim resistance (*dfrA1*), colistin resistance (*mcr-1*), and ESBL (*blaCTX-M*) in clusters of antepartum sows clustered by antibiotic use.**

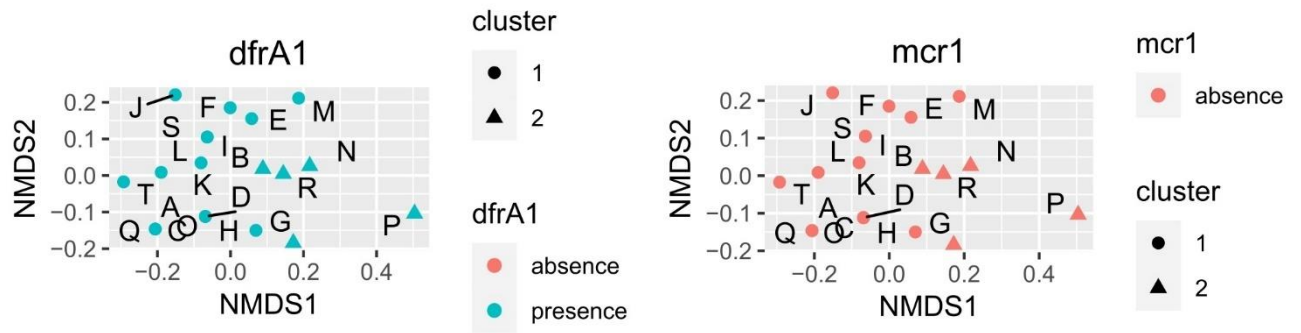

**S2 Fig. Distribution of trimethoprim resistance (*dfrA1*) and colistin resistance (*mcr-I*) in clusters of postpartum sows clustered by antibiotic use.**

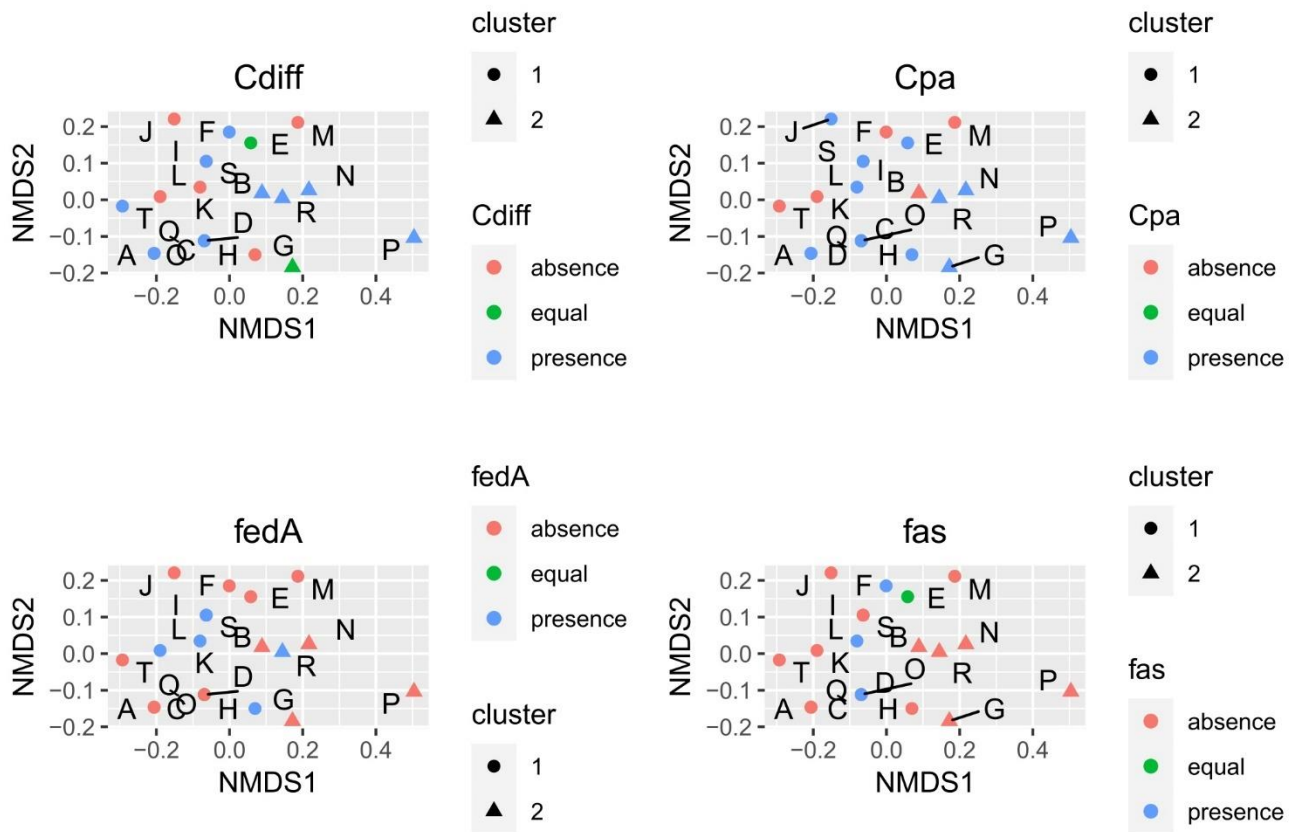

**S3 Fig. Distribution of *C. difficile* (*Cdiff*), *C. perfringens* (*Cpa*), *E. coli* F18 (*fedA*) and *E. coli* F4 (*fas*) in clusters of antepartum sows clustered by antibiotic use.**

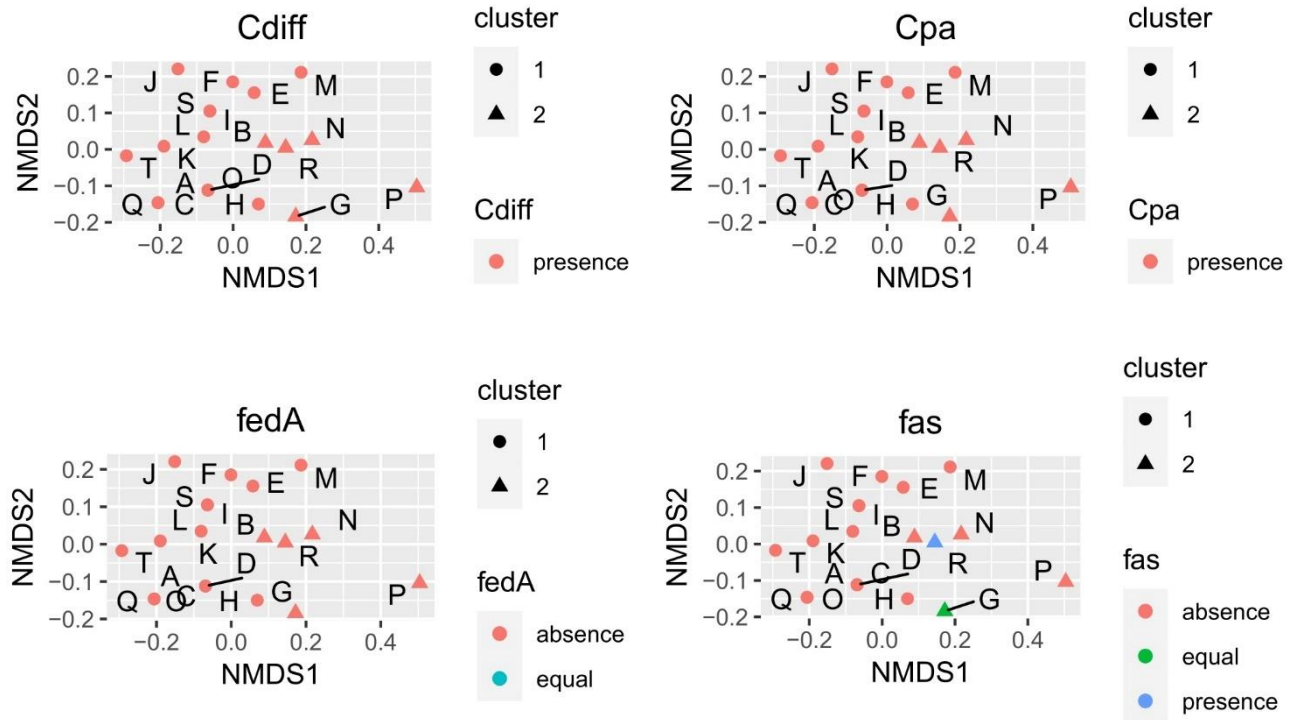

**S4 Fig. Distribution of *C. difficile* (*Cdiff*), *C. perfringens* (*Cpa*), *E. coli* F18 (*fedA*) and *E. coli* F4 (*fas*) in clusters of antepartum sows clustered by antibiotic use.**

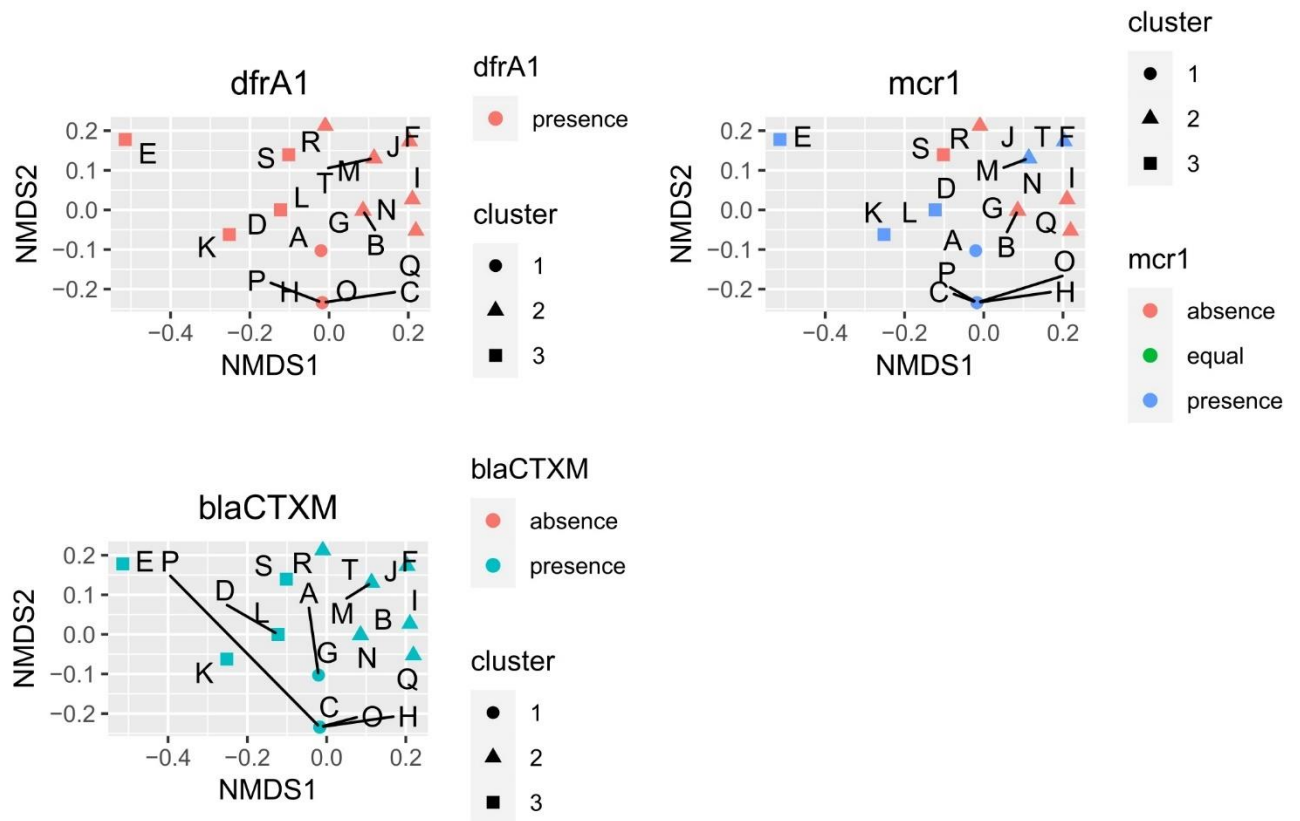

**S5 Fig. Distribution of trimethoprim resistance (*dfrA1*), colistin resistance (*mcr-1*), and ESBL (*bla<sub>CTX-M</sub>*) in clusters of suckling piglets clustered by antibiotic use.**

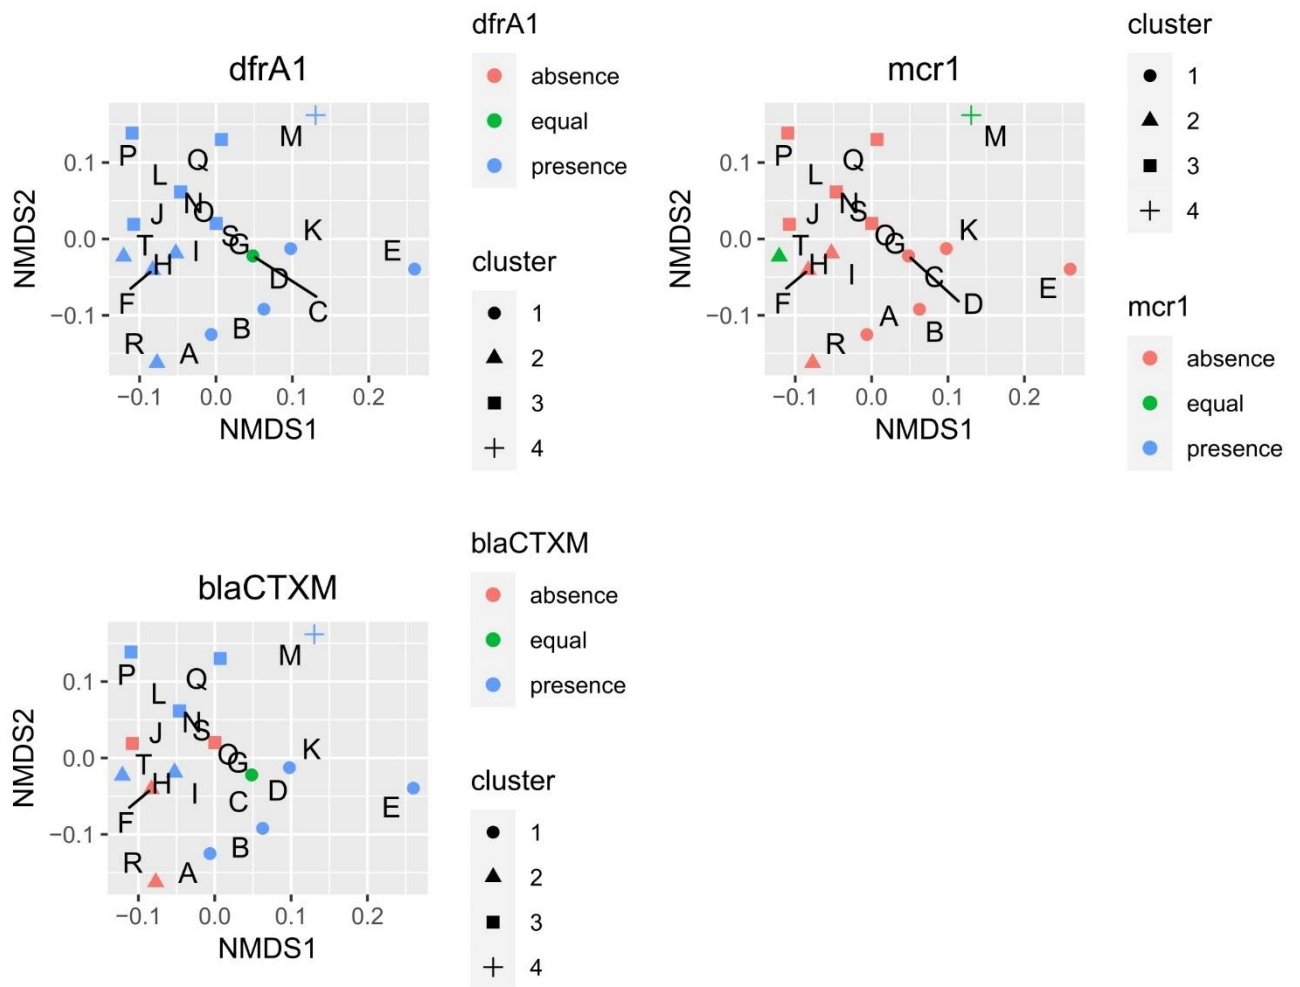

**S6 Fig. Distribution of trimethoprim resistance (*dfrA1*), colistin resistance (*mcr-1*), and ESBL (*blaCTX-M*) in clusters of weaned piglets clustered by antibiotic use.**

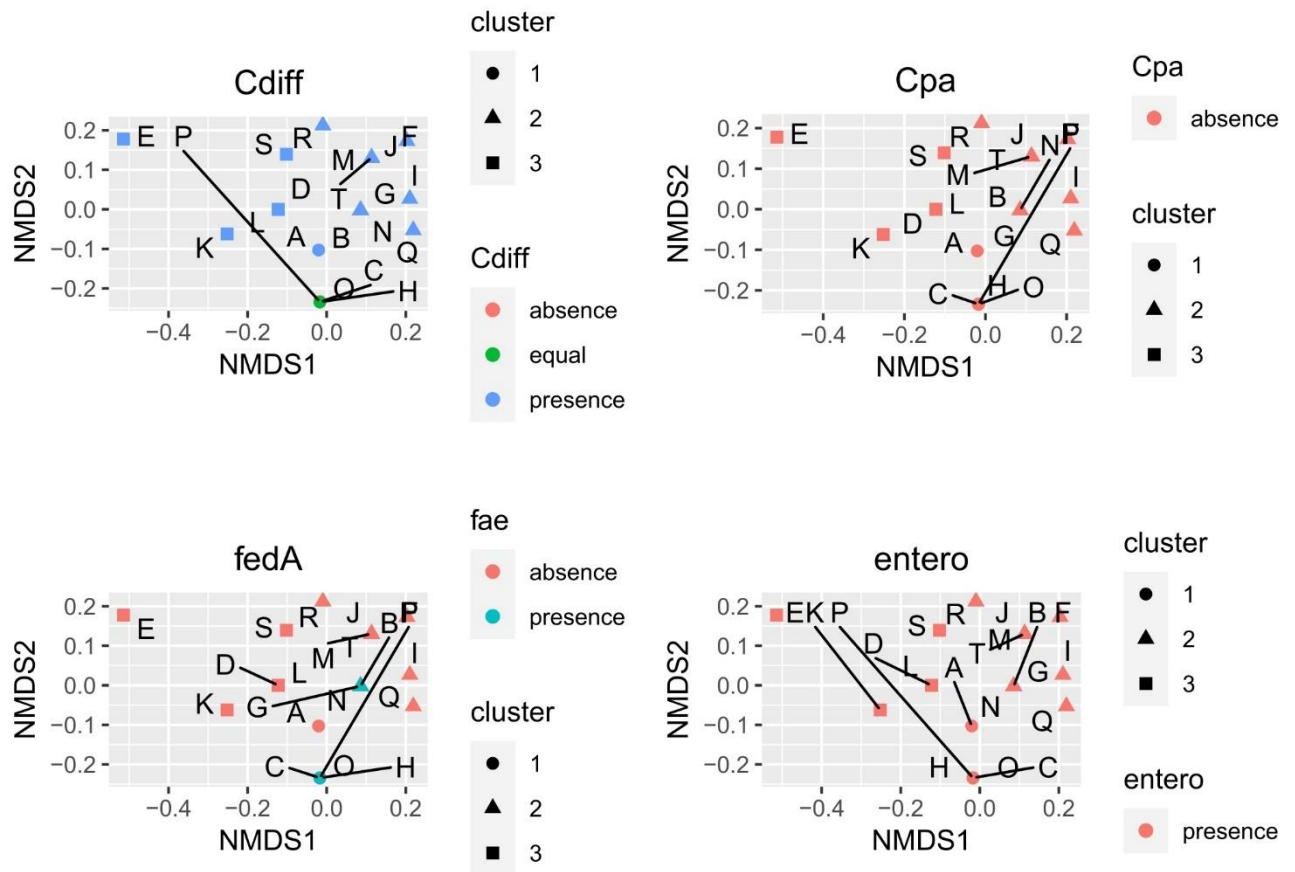

**S7 Fig. Distribution of *C. difficile* (*Cdiff*), *C. perfringens* (*Cpa*), *E. coli* F18 (*fedA*), *Escherichia/Shigella/Hafnia* (*entero*) in clusters of suckling piglets clustered by antibiotic use.**

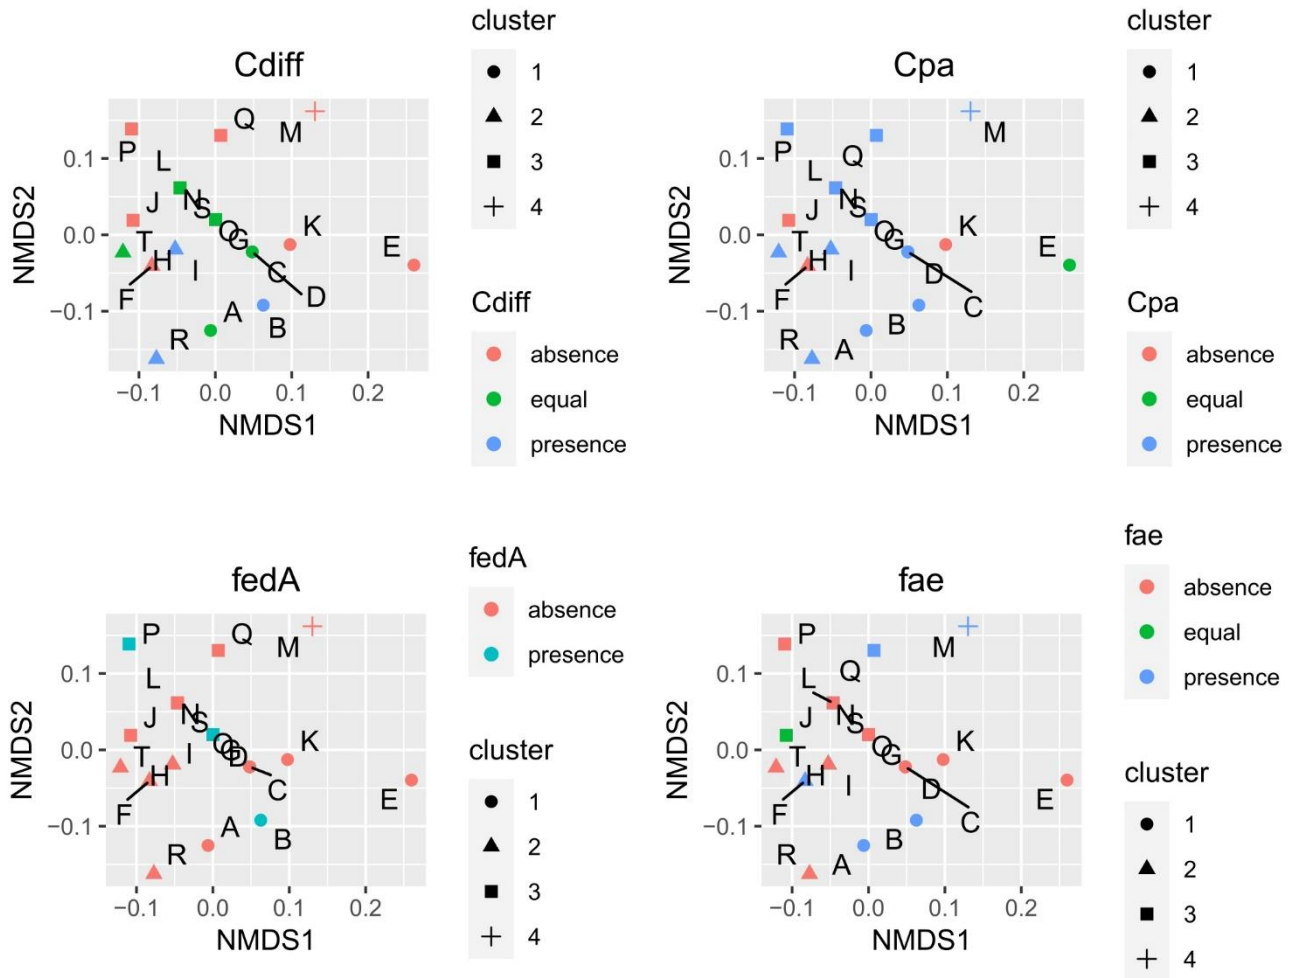

**S8 Fig. Distribution of *C. difficile* (*Cdiff*), *C. perfringens* (*Cpa*), *E. coli* F18 (*fedA*), and *E. coli* F6 (*fae*) in clusters of weaned piglets clustered by antibiotic use.**



## 2 Tables

**S1 Table. Primer sequences, Annealing temperatures, and product sizes of target genes.**

| Target gene                                 | Primer Name             | Sequence                       | Annealing (°C) | Product size (bp) | Ref. |
|---------------------------------------------|-------------------------|--------------------------------|----------------|-------------------|------|
| Colistin resistance                         | mcr-1-f                 | 5'-GGGCCTGCGTATTTTAAGCG-3'     | 50             | 186               | (2)  |
|                                             | mcr-1-r                 | 5'-CATAGGCATTGCTGTGCGTC-3'     |                |                   |      |
| ESBL                                        | bla <sub>CTX-M</sub> -f | 5'-CGATGTGCAGTACCAGTAA-3'      | 50             | 591               | (4)  |
|                                             | bla <sub>CTX-M</sub> -r | 5'-TTAGTGACCAGAATCAGCGG-3'     |                |                   |      |
| Integrase 1                                 | Int1-f                  | 5'-AGGATGCGAACCCTTCATC-3'      | 56             | 840               | (1)  |
|                                             | Int1-r                  | 5'-GCTGTTCTTCTACGGCAAGG-3'     |                |                   |      |
| Sulfonamide resistance                      | Sul1-3-f                | 5'-CGATCCGGGGATGGGATTTT-3'     | 60             | 112               | I*   |
|                                             | Sul1-3-r                | 5'-CACCGAGACCAATAGCGGAA-3'     |                |                   |      |
| Trimethoprim resistance                     | dfrA1-f                 | 5'-GGAGTGCCAAAGGTGAACAGC-3'    | 50             | 356               | (3)  |
|                                             | dfrA1-r                 | 5'-GAGGCGAAGTCTTGGGTAAAAAC-3'  |                |                   |      |
| <i>C. difficile</i> 16S rRNA                | Cdiff-16S-1f            | 5'-TTGAGCGATTTACTTCGGTAAAGA-3' | 58             | 89                | (7)  |
|                                             | Cdiff-16S-1r            | 5'-CCATCCTGTACTGGCTCACCT-3'    |                |                   |      |
| <i>C. perfringens</i> alpha toxin           | cpa1-f                  | 5'-TGACACAGGGGAATCACAAA-3'     | 55             | 238               | I*   |
|                                             | cpa1-r                  | 5'-CGCTATCAACGGCAGTAACA-3'     |                |                   |      |
| <i>E. coli</i> F4 fimbriae                  | fas-f                   | 5'-GTAACCTCCACGGTTTGTATC-3'    | 55             | 409               | (8)  |
|                                             | fas-r                   | 5'-AAGTTACTGCCAGTCTATGC-3'     |                |                   |      |
| <i>E. coli</i> F18 fimbriae                 | fedA-f                  | 5'-TGGTAACGTATCAGCAACTA-3'     | 55             | 313               | (8)  |
|                                             | fedA-r                  | 5'-ACTTACAGTGCTATTCGACG-3'     |                |                   |      |
| <i>E. coli</i> F4 fimbriae                  | Fae-f                   | 5'-GTTGGTACAGGTCTTAATGG-3'     | 55             | 499               | (8)  |
|                                             | Fae-r                   | 5'-GAATCTGTCCGAGAATATCA-3'     |                |                   |      |
| 16S rRNA <i>Escherichia/Shigella/Hafnia</i> | entero-f                | 5'-GTTAATACCTTTGCTCATTGA-3'    | 50             | 340               | (5)  |
|                                             | entero-r                | 5'-ACCAGGGTATCTAATCCTGTT-3'    |                |                   |      |
| <i>Salmonella</i> enterotoxin               | QVR-133                 | 5'-GAAGCAGCGCCTGTAAAATC-3'     | 60             | 198               | (6)  |
|                                             | QVR-134                 | 5'-TGGCTGTGGTGCAAAATATC-3'     |                |                   |      |

\*Institute of Animal Nutrition, Freie Universität, Berlin

1. Weldhagen GF. Stability of GES-type extended-spectrum  $\beta$ -lactamase genes during antibiotic exposure. *Southern African Journal of Epidemiology and Infection*. 2015;22(4):119-22.
2. Hembach N, Schmid F, Alexander J, Hiller C, Rogall ET, Schwartz T. Occurrence of the mcr-1 Colistin Resistance Gene and other Clinically Relevant Antibiotic Resistance Genes in Microbial Populations at Different Municipal Wastewater Treatment Plants in Germany. *Frontiers in Microbiology*. 2017;8:11.
3. Toro CS, Farfan M, Contreras I, Flores O, Navarro N, Mora GC, et al. Genetic analysis of antibiotic-resistance determinants in multidrug-resistant *Shigella* strains isolated from Chilean children. *Epidemiol Infect*. 2005;133(1):81-6.
4. Roschanski N, Fischer J, Guerra B, Roesler U. Development of a multiplex real-time PCR for the rapid detection of the predominant beta-lactamase genes CTX-M, SHV, TEM and CIT-type AmpCs in Enterobacteriaceae. *PloS one*. 2014;9(7):e100956.
5. Malinen E, Kassinen A, Rinttilä T, Palva A. Comparison of real-time PCR with SYBR Green I or 5'-nuclease assays and dot-blot hybridization with rDNA-targeted oligonucleotide probes in quantification of selected faecal bacteria. *Microbiology (Reading)*. 2003;149(Pt 1):269-77.
6. Riyaz-Ul-Hassan S, Verma V, Qazi GN. Real-time PCR-based rapid and culture-independent detection of *Salmonella* in dairy milk--addressing some core issues. *Letters in applied microbiology*. 2013;56(4):275-82.
7. Penders J, Vink C, Driessen C, London N, Thijs C, Stobberingh EE. Quantification of *Bifidobacterium* spp., *Escherichia coli* and *Clostridium difficile* in faecal samples of breast-fed and formula-fed infants by real-time PCR. *FEMS Microbiol Lett*. 2005;243(1):141-7.
8. Casey TA, Bosworth BT. Design and evaluation of a multiplex polymerase chain reaction assay for the simultaneous identification of genes for nine different virulence factors associated with *Escherichia coli* that cause diarrhea and edema disease in swine. *Journal of veterinary diagnostic investigation : official publication of the American Association of Veterinary Laboratory Diagnosticians, Inc.* 2009;21(1):25-30.

**S2 Table. Overall concentration of antibiotic resistance genes, enterobacterial genes, and virulence genes in sow and piglet fecal samples of 20 pig farms [log copy number/g sample] (n=802).**

| Farm             | <i>Salmonella</i> | <i>C. perfringens</i> | <i>C. difficile</i> | <i>Escherichia</i> | <i>fedA</i> | <i>fae</i> | <i>fas</i> | <i>dfrA1</i> | <i>sul1-3</i> | <i>bla<sub>CTX-M</sub></i> | <i>mcr-1</i> | <i>int1</i> |
|------------------|-------------------|-----------------------|---------------------|--------------------|-------------|------------|------------|--------------|---------------|----------------------------|--------------|-------------|
| A                | n.d.              | 6.39                  | 5.22                | 8.68               | 4.47        | 6.61       | 4.53       | 6.23         | 7.97          | 6.87                       | 4.11         | 8.09        |
| B                | n.d.              | 5.46                  | 5.46                | 8.89               | 5.27        | 6.34       | 4.25       | 6.44         | 7.74          | 5.72                       | 4.53         | 7.64        |
| C                | 4.20              | 6.89                  | 5.13                | 8.73               | 5.06        | 5.70       | 3.72       | 5.48         | 7.54          | 5.20                       | 3.80         | 7.50        |
| D                | 3.59              | 5.92                  | 4.78                | 8.61               | 5.34        | n.d.       | 4.64       | 5.77         | 7.74          | 5.35                       | 3.64         | 7.35        |
| E                | 4.17              | 6.89                  | 4.78                | 8.21               | 3.73        | 4.19       | 4.54       | 6.58         | 7.84          | 5.48                       | 3.85         | 7.77        |
| F                | 4.20              | 5.44                  | 4.78                | 8.25               | 8.08        | 6.00       | 4.83       | 6.20         | 7.93          | 5.80                       | 4.13         | 7.88        |
| G                | 3.92              | 6.67                  | 4.98                | 8.39               | 3.20        | n.d.       | 4.23       | 5.19         | 7.48          | 5.35                       | 3.50         | 7.60        |
| H                | 4.52              | 6.41                  | 4.86                | 8.05               | 4.67        | 7.94       | 4.09       | 6.09         | 8.14          | 5.16                       | 2.21         | 8.23        |
| I                | 3.66              | 6.75                  | 5.14                | 8.36               | 3.88        | 6.38       | 4.05       | 5.83         | 7.56          | 5.88                       | 3.85         | 7.60        |
| J                | 4.58              | 5.97                  | 3.96                | 8.41               | 4.63        | 6.62       | 4.30       | 5.72         | 7.46          | 4.88                       | 3.62         | 7.64        |
| K                | 4.29              | 6.32                  | 4.90                | 8.34               | 4.27        | 4.07       | 4.10       | 6.15         | 8.13          | 5.93                       | 3.39         | 8.11        |
| L                | 3.83              | 6.50                  | 4.22                | 7.45               | 4.64        | 5.40       | 4.04       | 6.09         | 7.60          | 5.41                       | 2.94         | 7.66        |
| M                | 3.48              | 6.37                  | 4.71                | 8.23               | 3.46        | 6.33       | 3.83       | 6.02         | 7.79          | 6.19                       | 3.25         | 7.85        |
| N                | 4.60              | 6.67                  | 4.35                | 8.37               | 4.38        | 5.83       | 4.03       | 5.87         | 7.74          | 5.12                       | 3.12         | 7.55        |
| O                | n.d.              | 6.41                  | 4.15                | 8.24               | 4.46        | 3.99       | 4.04       | 5.65         | 7.76          | 5.20                       | 2.70         | 7.63        |
| P                | 3.19              | 5.92                  | 5.22                | 7.80               | 3.98        | 6.74       | 3.92       | 6.02         | 7.98          | 5.10                       | 2.98         | 7.70        |
| Q                | 3.27              | 5.78                  | 5.29                | 8.05               | 5.94        | 6.40       | 4.20       | 5.67         | 7.53          | 5.11                       | 3.45         | 7.98        |
| R                | 4.20              | 6.76                  | 4.73                | 8.26               | 6.02        | 5.13       | 4.84       | 5.30         | 7.80          | 4.63                       | 3.92         | 7.62        |
| S                | n.d.              | 5.73                  | 4.86                | 8.77               | 4.18        | 6.98       | 4.83       | 6.05         | 7.78          | 4.92                       | 3.28         | 7.90        |
| T                | n.d.              | 5.67                  | 5.03                | 8.72               | 2.87        | 5.84       | 5.41       | 7.05         | 8.24          | 4.99                       | 4.19         | 8.24        |
| <b>p- value*</b> | 0.524             | 0.001                 | 0.000               | 0.000              | 0.007       | 0.022      | 0.022      | 0.000        | 0.000         | 0.000                      | 0.018        | 0.000       |
| <b>Total</b>     | 4.08              | 6.27                  | 4.85                | 8.34               | 4.85        | 6.17       | 4.31       | 6.00         | 7.79          | 5.47                       | 3.54         | 7.78        |
| <b>SEM</b>       | 0.13              | 0.07                  | 0.06                | 0.05               | 0.15        | 0.13       | 0.06       | 0.04         | 0.03          | 0.06                       | 0.10         | 0.03        |

n.d. = not detected

\* Kruskal- Wallis Test, (p≤0.05)

*Salmonella* = QVR gene, *Clostridium perfringens* = cpa gene, *Escherichia* = 16S rDNA of the phylogenetic *Escherichia/Hafnia/Shigella* group, *fedA* = *E. coli* fimbriae gene (F18), *fae* = *E. coli* fimbriae gene (F4), *fas* = *E. coli* fimbriae F6 gene; *sul1-3* = enterobacterial sulfonamide resistance gene, *bla<sub>CTX-M</sub>* = enterobacterial ESBL gene, *mcr-1* = enterobacterial colistin gene, *int1* = enterobacterial integrase I gene

**S3 Table. Overall prevalence of antibiotic resistance genes, enterobacterial genes, and virulence genes sow and piglet fecal samples of 20 pig farms [%] (n=802).**

| Farm         | <i>bla<sub>CTX-M</sub></i> | <i>dfrA1</i> | <i>int1</i> | <i>mcr-1</i> | <i>sul1-3</i> | <i>C. difficile</i> | <i>C. perfringens</i> | <i>Escherichia</i> | <i>fae</i> | <i>fas</i> | <i>fedA</i> | <i>Salmonella</i> |
|--------------|----------------------------|--------------|-------------|--------------|---------------|---------------------|-----------------------|--------------------|------------|------------|-------------|-------------------|
| A            | 66.67                      | 94.87        | 100.00      | 28.21        | 100.00        | 58.97               | 69.23                 | 100.00             | 25.64      | 12.82      | 10.26       | 0.00              |
| B            | 40.00                      | 85.00        | 100.00      | 40.00        | 100.00        | 72.50               | 90.00                 | 100.00             | 30.00      | 10.00      | 25.00       | 0.00              |
| C            | 35.90                      | 46.15        | 100.00      | 17.95        | 100.00        | 82.05               | 89.74                 | 89.74              | 10.26      | 17.95      | 28.21       | 7.69              |
| D            | 42.50                      | 75.00        | 100.00      | 17.50        | 100.00        | 82.50               | 82.50                 | 87.50              | 0.00       | 17.50      | 42.50       | 12.50             |
| E            | 60.00                      | 92.50        | 100.00      | 27.50        | 100.00        | 62.50               | 80.00                 | 100.00             | 2.50       | 30.00      | 5.00        | 2.50              |
| F            | 34.15                      | 92.68        | 100.00      | 21.95        | 100.00        | 63.41               | 60.98                 | 100.00             | 41.46      | 21.95      | 7.32        | 4.88              |
| G            | 45.00                      | 75.00        | 100.00      | 12.50        | 95.00         | 67.50               | 90.00                 | 100.00             | 0.00       | 10.00      | 12.50       | 15.00             |
| H            | 40.00                      | 92.50        | 100.00      | 15.00        | 95.00         | 70.00               | 95.00                 | 97.50              | 12.50      | 20.00      | 25.00       | 12.50             |
| I            | 60.00                      | 85.00        | 100.00      | 10.00        | 100.00        | 70.00               | 95.00                 | 95.00              | 15.00      | 15.00      | 25.00       | 5.00              |
| J            | 27.50                      | 90.00        | 100.00      | 30.00        | 100.00        | 60.00               | 80.00                 | 100.00             | 15.00      | 30.00      | 12.50       | 12.50             |
| K            | 36.59                      | 90.24        | 100.00      | 31.71        | 90.24         | 63.41               | 85.37                 | 100.00             | 2.44       | 31.71      | 26.83       | 14.63             |
| L            | 45.00                      | 85.00        | 100.00      | 47.50        | 97.50         | 62.50               | 62.50                 | 97.50              | 17.50      | 12.50      | 22.50       | 2.50              |
| M            | 77.50                      | 85.00        | 100.00      | 35.00        | 100.00        | 57.50               | 77.50                 | 100.00             | 20.00      | 12.50      | 10.00       | 2.50              |
| N            | 85.71                      | 83.33        | 100.00      | 16.67        | 100.00        | 66.67               | 92.86                 | 100.00             | 40.48      | 9.52       | 11.90       | 7.14              |
| O            | 46.34                      | 82.93        | 100.00      | 21.95        | 97.56         | 46.34               | 97.56                 | 95.12              | 2.44       | 31.71      | 19.51       | 0.00              |
| P            | 60.00                      | 92.50        | 100.00      | 35.00        | 97.50         | 72.50               | 92.50                 | 100.00             | 42.50      | 25.00      | 12.50       | 2.50              |
| Q            | 47.37                      | 89.47        | 100.00      | 28.95        | 100.00        | 68.42               | 84.21                 | 100.00             | 34.21      | 15.79      | 26.32       | 7.89              |
| R            | 31.71                      | 87.80        | 100.00      | 12.20        | 100.00        | 73.17               | 90.24                 | 97.56              | 29.27      | 29.27      | 43.90       | 2.44              |
| S            | 45.00                      | 95.00        | 100.00      | 27.50        | 100.00        | 77.50               | 85.00                 | 100.00             | 10.00      | 22.50      | 22.50       | 0.00              |
| T            | 52.50                      | 97.50        | 100.00      | 37.50        | 100.00        | 72.50               | 70.00                 | 100.00             | 7.50       | 5.00       | 2.50        | 0.00              |
| <b>Total</b> | 49.00                      | 85.91        | 100.00      | 25.69        | 98.63         | 67.46               | 83.54                 | 98.00              | 17.96      | 19.08      | 19.58       | 5.61              |
| <b>SEM</b>   | 1.77                       | 1.23         | 0.00        | 1.54         | 0.41          | 1.66                | 1.31                  | 0.49               | 1.36       | 1.39       | 1.40        | 0.81              |

*Salmonella* = *QVR* gene, *Clostridium perfringens* = *cpa* gene, *Escherichia* = 16S rDNA of the phylogenetic *Escherichia/Hafnia/Shigella* group, *fedA* = *E. coli* fimbriae gene (F18), *fae* = *E. coli* fimbriae gene (F4), *fas* = *E. coli* fimbriae F6 gene; *sul1-3* = enterobacterial sulfonamide resistance gene, *bla<sub>CTX-M</sub>* = enterobacterial ESBL gene, *mcr-1* = enterobacterial colistin gene, *int1* = enterobacterial integrase I gene

**S4 Table. Comparison between ante- and postpartum (AP, PP) sows for the concentration and prevalence of antibiotic resistance genes, enterobacterial genes, and virulence genes in sow samples of 20 pig farms ([log copy number/g sample, (%)].**

| Target gene           | Concentration     |                   |          | Prevalence         |                     |           |
|-----------------------|-------------------|-------------------|----------|--------------------|---------------------|-----------|
|                       | AP                | PP                | p-value* | AP                 | PP                  | p-value** |
| blaCTXM               | 4.60              | 5.00              | 0.159    | 14.49 <sup>d</sup> | 38.69 <sup>c</sup>  | <0.001    |
| dfrA1                 | 5.63 <sup>b</sup> | 5.89 <sup>a</sup> | 0.019    | 92.27 <sup>c</sup> | 76.88 <sup>d</sup>  | <0.001    |
| int1                  | 7.63 <sup>a</sup> | 7.39 <sup>b</sup> | <0.001   | 100.00             | 100.00              | n.a       |
| mcr-1                 | 3.78 <sup>b</sup> | 4.90 <sup>a</sup> | <0.001   | 14.01 <sup>c</sup> | 7.54 <sup>d</sup>   | 0.036     |
| sul1-3                | 7.62 <sup>b</sup> | 7.85 <sup>a</sup> | 0.001    | 94.69 <sup>d</sup> | 100.00 <sup>c</sup> | 0.001     |
| <i>C. difficile</i>   | 4.43              | 4.47              | 0.111    | 58.94 <sup>d</sup> | 93.97 <sup>c</sup>  | <0.001    |
| <i>C. perfringens</i> | 5.68              | 5.83              | 0.402    | 66.67 <sup>d</sup> | 98.99 <sup>c</sup>  | <0.001    |
| <i>Escherichia</i>    | 7.95 <sup>b</sup> | 8.52 <sup>a</sup> | <0.001   | 100.00             | 100.00              | n.a       |
| fae                   | 5.59              | 6.18              | 0.079    | 8.21               | 12.56               | 0.15      |
| fas                   | 4.58              | 4.46              | 0.183    | 23.19              | 19.10               | 0.313     |
| fedA                  | 3.81 <sup>b</sup> | 4.49 <sup>a</sup> | <0.001   | 33.33 <sup>c</sup> | 13.57 <sup>d</sup>  | <0.001    |
| <i>Salmonella</i>     | 4.26              | 3.78              | 0.370    | 7.73               | 5.03                | 0.266     |

\*Mann-Whitney Test: a,b denotes significant difference for time point, (p≤0.05)

\*\*Chi- squared Test: c,d denotes significant difference for time point, (p≤0.05)

n.a.= not available

*Salmonella* = QVR gene, *Clostridium perfringens* = cpa gene, *Escherichia* = 16S rDNA of the phylogenetic *Escherichia/Hafnia/Shigella* group, fedA = *E. coli* fimbriae gene (F18), fae = *E. coli* fimbriae gene (F4), fas = *E. coli* fimbriae F6 gene; sul1-3 = enterobacterial sulfonamide resistance gene, blaCTX-M = enterobacterial ESBL gene, mcr-1 = enterobacterial colistin gene, int1 = enterobacterial integrase I gene

**S5 Table. Comparison of suckling- and weaned piglets for the concentration and prevalence of antibiotic resistance genes, enterobacterial genes, and virulence genes in piglet samples of 20 pig farms ([log copy number/g sample, [%]).**

| Target gene           | Concentration     |                   |          | Prevalence         |                     |           |
|-----------------------|-------------------|-------------------|----------|--------------------|---------------------|-----------|
|                       | Suckling          | Weaned            | p-value* | Suckling           | Weaned              | p-value** |
| blaCTXM               | 5.78 <sup>a</sup> | 5.55 <sup>b</sup> | 0.027    | 86.29 <sup>c</sup> | 58.29 <sup>d</sup>  | <0.001    |
| dfrA1                 | 6.16              | 6.35              | 0.154    | 90.36              | 83.92               | 0.056     |
| int1                  | 8.72 <sup>a</sup> | 7.38 <sup>b</sup> | <0.001   | 100.00             | 100.00              | n.a.      |
| mcr-1                 | 3.76 <sup>a</sup> | 2.69 <sup>b</sup> | <0.001   | 52.28 <sup>c</sup> | 29.65 <sup>d</sup>  | <0.001    |
| sul1-3                | 8.46 <sup>a</sup> | 7.22 <sup>b</sup> | <0.001   | 100.00             | 100.00              | n.a.      |
| <i>C. difficile</i>   | 5.59 <sup>a</sup> | 5.03 <sup>b</sup> | 0.014    | 72.59 <sup>c</sup> | 44.72 <sup>d</sup>  | <0.001    |
| <i>C. perfringens</i> | 7.98 <sup>a</sup> | 5.05 <sup>b</sup> | <0.001   | 99.49 <sup>c</sup> | 69.85 <sup>d</sup>  | <0.001    |
| <i>Escherichia</i>    | 8.37 <sup>b</sup> | 8.52 <sup>a</sup> | 0.026    | 91.88 <sup>d</sup> | 100.00 <sup>c</sup> | <0.001    |
| fae                   | 6.27              | 6.27              | 1.000    | 12.18 <sup>d</sup> | 39.20 <sup>c</sup>  | <0.001    |
| fas                   | 3.95              | 4.20              | 0.114    | 21.32 <sup>c</sup> | 12.56 <sup>d</sup>  | 0.020     |
| fedA                  | 4.37 <sup>b</sup> | 6.73 <sup>a</sup> | <0.001   | 7.11 <sup>d</sup>  | 23.62 <sup>c</sup>  | <0.001    |
| <i>Salmonella</i>     | 4.14              | 4.03              | 0.457    | 4.06               | 5.53                | 0.495     |

\*Mann-Whitney Test: a,b denotes significant difference for time point, (p≤0.05)

\*\*Chi- squared Test: c,d denotes significant difference for time point, (p≤0.05)

n.a.= not available

*Salmonella* = QVR gene, *Clostridium perfringens* = cpa gene, *Escherichia* = 16S rDNA of the phylogenetic *Escherichia/Hafnia/Shigella* group, fedA = *E. coli* fimbriae gene (F18), fae = *E. coli* fimbriae gene (F4), fas = *E. coli* fimbriae F6 gene; sul1-3 = enterobacterial sulfonamide resistance gene, blaCTX-M = enterobacterial ESBL gene, mcr-1 = enterobacterial colistin gene, int1 = enterobacterial integrase I gene

**S6 Table. Results of the logistic regression model for the presence of *dfrA1* gene as the dependent variable in antepartum sows.**

| Variable           | Estimate | Std.Error | odds ratios | OR lower CI | OR upper CI | p-value |
|--------------------|----------|-----------|-------------|-------------|-------------|---------|
| Intercept          | 2.49     | 0.43      | 12.08       | 5.20        | 28.05       | <0.001  |
| Amoxicillin (oral) | -2.76    | 1.07      | 0.06        | 0.01        | 0.51        | 0.001   |
| Amoxicillin        | 2.00     | 0.82      | 7.42        | 1.47        | 37.38       | 0.015   |
| Neomycin (oral)    | -2.30    | 1.36      | 0.10        | 0.01        | 1.45        | 0.092   |
| Trimethoprim       | -1.25    | 0.64      | 0.29        | 0.08        | 1.00        | 0.050   |

\*in combination with sulfadimidine

**S7 Table. Results of the linear regression model for the concentration of *dfrA1* gene as the dependent variable in antepartum sows.**

| Variable      | Estimate | Std.Error | p-value |
|---------------|----------|-----------|---------|
| Intercept     | 5.4701   | 0.0937    | >0.001  |
| Amoxicillin   | 0.2113   | 0.1215    | 0.0835  |
| Lincomycin    | -0.3558  | 0.1701    | 0.0378  |
| Trimethoprim* | 0.2347   | 0.1366    | 0.0875  |
| Tylosin       | 0.4508   | 0.2579    | 0.0821  |

\*in combination with sulfadimidine

**S8 Table. Results of the logistic regression model for the presence of *dfrA1* gene as the dependent variable in postpartum sows.**

| Variable           | Estimate | Std.Error | odds ratios | OR lower CI | OR upper CI | p-value |
|--------------------|----------|-----------|-------------|-------------|-------------|---------|
| Intercept          | 0.45     | 0.35      | 1.56        | 0.79        | 3.11        | 0.2013  |
| Amoxicillin (oral) | 1.93     | 0.83      | 6.87        | 1.36        | 34.65       | 0.0196  |
| Amoxicillin        | -0.64    | 0.46      | 0.53        | 0.22        | 1.29        | 0.1610  |
| Enrofloxacin       | 1.03     | 0.51      | 2.81        | 1.03        | 7.62        | 0.0428  |
| Florfenicol        | 1.49     | 0.59      | 4.43        | 1.39        | 14.13       | 0.0120  |
| Trimethoprim*      | 1.11     | 0.53      | 3.03        | 1.08        | 8.53        | 0.0353  |
| Tylosin            | 1.58     | 0.96      | 4.85        | 0.74        | 31.60       | 0.0989  |

\*in combination with sulfadimidine

**S9 Table. Results of the linear regression model for the concentration of *drfA1* gene as the dependent variable in postpartum sows.**

| Variable           | Estimate | Std.Error | p-value |
|--------------------|----------|-----------|---------|
| Intercept          | 5.19     | 0.14      | <0.001  |
| Amoxicillin (oral) | 1.04     | 0.24      | <0.001  |
| Enrofloxacin       | 0.50     | 0.18      | 0.0058  |
| Florfenicol        | 1.01     | 0.18      | <0.001  |
| Neomycin (oral)    | 0.78     | 0.31      | 0.0129  |
| Trimethoprim*      | 0.51     | 0.16      | 0.0011  |

\*in combination with sulfadimidine

**S10 Table. Results of the logistic regression model for the presence of *bla<sub>CTX-M</sub>* gene as the dependent variable in postpartum sows.**

| Variable        | Estimate | Std.Error | odds ratios | OR lower CI | OR upper CI | p-value |
|-----------------|----------|-----------|-------------|-------------|-------------|---------|
| Intercept       | -1.01    | 0.25      | 0.36        | 0.22        | 0.59        | <0.001  |
| Enrofloxacin    | -1.83    | 0.76      | 0.16        | 0.04        | 0.71        | 0.0163  |
| Florfenicol     | 1.37     | 0.41      | 3.95        | 1.77        | 8.84        | <0.001  |
| Lincomycin      | 4.34     | 0.86      | 76.67       | 14.22       | 413.43      | <0.001  |
| Neomycin (oral) | 2.84     | 0.97      | 17.14       | 14.22       | 114.42      | 0.0033  |

**S11 Table. Results of the linear regression model for the concentration of *bla<sub>CTX-M</sub>* gene as the dependent variable in postpartum sows.**

| Variable           | Estimate | Std.Error | p-value |
|--------------------|----------|-----------|---------|
| Intercept          | 5.44     | 0.20      | <0.001  |
| Amoxicillin (oral) | -0.81    | 0.46      | 0.0819  |
| Enrofloxacin       | -1.37    | 0.39      | <0.001  |
| Lincomycin         | 0.86     | 0.40      | 0.0353  |
| Trimethoprim*      | -0.85    | 0.32      | 0.0096  |

\*in combination with sulfadimidine

**S12 Table. Results of the linear regression model for the concentration of *dfrA1* gene as the dependent variable in suckling piglets.**

| Variable          | Estimate | Std.Error | p-value |
|-------------------|----------|-----------|---------|
| Intercept         | 5.2643   | 0.233     | <0.001  |
| Amoxicillin       | 0.983    | 0.2826    | <0.001  |
| Cefquinome        | 2.3757   | 0.5437    | <0.001  |
| Florfenicol       | 1.0659   | 0.5301    | 0.0459  |
| Benzylpenicillin* | 0.9941   | 0.3437    | 0.0043  |

\*in combination with streptomycin

**S13 Table. Results of the logistic regression model for the presence of *mcr-1* gene as the dependent variable in suckling piglets.**

| Variable          | Estimate | Std.Error | odds ratios | OR lower CI | OR upper CI | p-value |
|-------------------|----------|-----------|-------------|-------------|-------------|---------|
| Intercept         | -0.15    | 0.32      | 0.86        | 0.46        | 1.61        | 0.6313  |
| Amoxicillin       | 2.22     | 1.08      | 9.20        | 1.12        | 75.71       | 0.0390  |
| Cefquinome        | 2.42     | 1.25      | 11.25       | 0.97        | 130.21      | 0.0527  |
| Ceftiofur         | -2.04    | 1.10      | 0.13        | 0.01        | 1.10        | 0.0637  |
| Florfenicol       | 2.06     | 1.12      | 7.87        | 0.88        | 70.14       | 0.0644  |
| Benzylpenicillin* | 2.33     | 1.12      | 10.29       | 1.15        | 91.61       | 0.0367  |

\*in combination with streptomycin

**S14 Table. Results of the linear regression model for the concentration of *mcr-1* gene as the dependent variable in suckling piglets.**

| Variable    | Estimate | Std.Error | p-value |
|-------------|----------|-----------|---------|
| Intercept   | 0.97     | 2.24      | 0.6661  |
| Amoxicillin | 0.50     | 0.22      | 0.0267  |
| Cefquinome  | 0.74     | 0.46      | 0.1110  |
| Ceftiofur   | 0.32     | 0.23      | 0.1690  |
| Colistin    | -0.85    | 0.42      | 0.0459  |

**S15 Table. Results of the logistic regression model for the presence of *dfrA1* gene as the dependent variable in weaned piglets.**

| Variable           | Estimate | Std.Error | odds ratios | OR lower CI | OR upper CI | p-value |
|--------------------|----------|-----------|-------------|-------------|-------------|---------|
| Intercept          | 0.85     | 0.29      | 2.35        | 1.32        | 4.18        | 0.0037  |
| Amoxicillin        | 1.06     | 0.42      | 2.89        | 1.26        | 6.61        | 0.0118  |
| Amoxicillin (oral) | 0.49     | 0.48      | 1.63        | 0.64        | 4.15        | 0.3062  |
| Cefquinome         | 1.12     | 0.81      | 3.07        | 0.63        | 15.06       | 0.1660  |



**S16 Table. Results of the beta linear regression model for the concentration of *dfrA1* gene as the dependent variable in weaned piglets.**

| Variable           | Estimate | Std.Error | p-value |
|--------------------|----------|-----------|---------|
| Intercept          | 1.22     | 1.26      | 0.3375  |
| Amoxicillin (oral) | 0.39     | 0.17      | 0.0198  |
| Colistin (oral)    | 1.06     | 0.28      | <0.001  |
| Lincomycin         | 0.80     | 0.33      | 0.0166  |
| Neomycin (oral)    | 0.64     | 0.31      | 0.0398  |

**Table 17. Results of the logistic regression model for the presence of *mcr-1* gene as the dependent variable in weaned piglets.**

| Variable           | Estimate | Std.Error | odds ratios | OR lower CI | OR upper CI | p-value |
|--------------------|----------|-----------|-------------|-------------|-------------|---------|
| Intercept          | -1.10    | 0.25      | 0.33        | 0.20        | 0.55        | <0.001  |
| Amoxicillin (oral) | -1.58    | 0.46      | 0.21        | 0.08        | 0.51        | <0.001  |
| Cefquinome         | 0.92     | 0.42      | 2.50        | 0.79        | 7.91        | 0.1189  |
| Doxycycline (oral) | 1.21     | 0.54      | 3.35        | 1.16        | 9.67        | 0.0251  |
| Enrofloxacin       | 1.60     | 0.47      | 4.97        | 1.97        | 12.57       | <0.001  |
| Lincomycin         | 2.68     | 0.80      | 14.64       | 3.03        | 70.78       | <0.001  |
| Neomycin (oral)    | -1.35    | 0.80      | 0.26        | 0.05        | 1.25        | 0.0928  |

**S18 Table. Results of the beta linear regression model for the concentration of *mcr-1* gene as the dependent variable in weaned piglets.**

| Variable           | Estimate | Std.Error | p-value |
|--------------------|----------|-----------|---------|
| Intercept          | 0.58     | 0.22      | 0.0111  |
| Amoxicillin (oral) | -0.97    | 0.49      | 0.0517  |
| Cefquinome         | 0.89     | 0.42      | 0.0376  |
| Doxycycline (oral) | 1.71     | 0.63      | 0.0099  |
| Lincomycin (oral)  | -1.80    | 0.74      | 0.0195  |
| Lincomycin         | 1.39     | 0.61      | 0.0286  |
| Neomycin (oral)    | -0.88    | 0.56      | 0.1254  |
| Oxytetracycline    | 1.73     | 0.57      | 0.0041  |

**S19 Table. Results of the logistic regression model for the presence of *bla*<sub>CTX-M</sub> gene as the dependent variable in weaned piglets.**

| Variable           | Estimate | Std.Error | odds ratios | OR lower CI | OR upper CI | p-value |
|--------------------|----------|-----------|-------------|-------------|-------------|---------|
| Intercept          | 0.19     | 0.17      | 1.21        | 0.86        | 1.68        | 0.2708  |
| Cefquinome         | 1.20     | 0.58      | 3.32        | 1.05        | 10.42       | 0.0402  |
| Doxycycline (oral) | -1.03    | 0.52      | 0.36        | 0.13        | 0.98        | 0.0452  |
| Lincomycin (oral)  | 3.04     | 1.16      | 21.00       | 2.16        | 204.59      | 0.0087  |
| Oxytetracycline    | 2.01     | 1.07      | 7.46        | 0.92        | 60.48       | 0.0598  |

**S20 Table. Results of the beta linear regression model for the concentration of *bla*<sub>CTX-M</sub> gene as the dependent variable in weaned piglets.**

| Variable           | Estimate | Std.Error | p-value |
|--------------------|----------|-----------|---------|
| Intercept          | -2.33    | 0.69      | 0.0010  |
| Amoxicillin        | 1.84     | 0.64      | 0.0052  |
| Amoxicillin (oral) | 0.73     | 0.33      | 0.0267  |
| Cefquinome         | 3.25     | 0.73      | <0.001  |
| Colistin (oral)    | 3.85     | 0.85      | <0.001  |
| Lincomycin (oral)  | -2.79    | 0.89      | 0.0023  |
| Lincomycin         | -1.01    | 0.57      | 0.0778  |
| Oxytetracycline    | 2.78     | 0.81      | <0.001  |

**S21 Table. Results of the logistic regression model for the presence of *C. difficile* (16s-rDNA gene) as the dependent variable in antepartum sows.**

| Variable           | Estimate | Std.Error | odds ratios | OR lower CI | OR upper CI | p-value |
|--------------------|----------|-----------|-------------|-------------|-------------|---------|
| Intercept          | 0.9126   | 0.2392    | 2.4907      | 1.5584      | 3.9807      | 0.0001  |
| Amoxicillin (oral) | -0.957   | 0.5192    | 0.384       | 0.1388      | 1.0624      | 0.0652  |
| Florfenicol        | -0.6583  | 0.3709    | 0.5177      | 0.2502      | 1.0711      | 0.0759  |
| Lincomycin         | -0.7506  | 0.436     | 0.472       | 0.2008      | 1.1096      | 0.0851  |
| Trimethoprim       | -0.6695  | 0.3376    | 0.5119      | 0.2641      | 0.9922      | 0.0473  |

\*in combination with sulfadimidine

**S22 Table. Results of the beta linear regression model for the concentration of *C. difficile* (16s-rDNA gene) as the dependent variable in antepartum sows.**

| Variable           | Estimate | Std.Error | p-value |
|--------------------|----------|-----------|---------|
| Intercept          | 0.3005   | 0.0587    | <0.001  |
| Amoxicillin (oral) | 0.2555   | 0.1584    | 0.1102  |
| Enrofloxacin       | 0.2875   | 0.0923    | 0.0024  |
| Lincomycin         | -0.5267  | 0.1207    | <0.001  |

**S23 Table. Results of the logistic regression model for the presence of *E. coli* F18 fimbriae (*fedA*) as the dependent variable in antepartum sows.**

| Variable           | Estimate | Std.Error | odds ratios | OR lower CI | OR upper CI | p-value |
|--------------------|----------|-----------|-------------|-------------|-------------|---------|
| Intercept          | -0.7053  | 0.1909    | 0.4939      | 0.3397      | 0.7181      | 0.0002  |
| Amoxicillin (oral) | -1.7245  | 1.0604    | 0.1782      | 0.0223      | 1.4246      | 0.1039  |
| Enrofloxacin       | 1.1908   | 0.413     | 3.2897      | 1.4642      | 7.3912      | 0.0039  |
| Lincomycin         | -1.5105  | 0.5926    | 0.2207      | 0.0691      | 0.7054      | 0.0108  |
| Neomycin (oral)    | -1.8718  | 0.8713    | 0.1538      | 0.0278      | 0.8486      | 0.0316  |

**S24 Table. Results of the beta linear regression model for the concentration of *E. coli* F18 fimbriae (*fedA*) as the dependent variable in antepartum sows.**

| Variable           | Estimate | Std.Error | p-value |
|--------------------|----------|-----------|---------|
| Intercept          | 4.5803   | 2.5462    | 0.0776  |
| Amoxicillin (oral) | -0.6014  | 0.3242    | 0.0690  |
| Amoxicillin        | -1.3458  | 0.8617    | 0.1241  |
| Enrofloxacin       | -1.1939  | 0.5013    | 0.0208  |
| Florfenicol        | -1.2416  | 0.5658    | 0.0325  |
| Lincomycin         | -1.4971  | 0.5485    | 0.0085  |
| Trimethoprim*      | -1.3322  | 0.5115    | 0.0118  |

\*in combination with sulfadimidine

**S25 Table. Results of the logistic regression model for the presence of *E. coli* F4 fimbriae (*fas*) as the dependent variable in antepartum sows.**

| Variable      | Estimate | Std.Error | odds ratios | OR lower CI | OR upper CI | p-value |
|---------------|----------|-----------|-------------|-------------|-------------|---------|
| Intercept     | -1.1058  | 0.2934    | 0.3309      | 0.1862      | 0.5881      | 0.0001  |
| Amoxicillin   | 1.1129   | 0.3847    | 3.0432      | 1.4318      | 6.4678      | 0.0038  |
| Enrofloxacin  | -1.1528  | 0.4566    | 0.3157      | 0.129       | 0.7726      | 0.0115  |
| Lincomycin    | -1.4435  | 0.676     | 0.2361      | 0.0627      | 0.8883      | 0.0327  |
| Trimethoprim* | -1.1582  | 0.4289    | 0.314       | 0.1354      | 0.728       | 0.0069  |

\*in combination with sulfadimidine

**S26 Table. Results of the beta linear regression model for the concentration of *C. difficile* (16s-rDNA gene) as the dependent variable in postpartum sows.**

| Variable           | Estimate | Std.Error | p-value |
|--------------------|----------|-----------|---------|
| Intercept          | -0.195   | 0.3656    | 0.5945  |
| Amoxicillin (oral) | 0.5499   | 0.3169    | 0.0847  |
| Enrofloxacin       | 1.1751   | 0.2491    | <0.001  |
| Florfenicol        | 1.0951   | 0.2679    | <0.001  |

**S27 Table. Results of the logistic regression model for the presence of *E. coli* F4 fimbriae (*fas*) as the dependent variable in postpartum sows.**

| Variable     | Estimate | Std.Error | odds ratios | OR lower CI | OR upper CI | p-value |
|--------------|----------|-----------|-------------|-------------|-------------|---------|
| Intercept    | -1.5995  | 0.2338    | 0.2019      | 0.1277      | 0.3194      | 0.0002  |
| Enrofloxacin | 1.0156   | 0.3969    | 2.7609      | 1.2682      | 6.0103      | 0.0105  |
| Lincomycin   | -1.8061  | 0.7849    | 0.2207      | 0.0352      | 0.7651      | 0.0214  |

**S28 Table. Results of the beta linear regression model for the presence of *E. coli* F4 fimbriae (*fas*) as the dependent variable in postpartum sows.**

| Variable      | Estimate | Std.Error | p-value |
|---------------|----------|-----------|---------|
| Intercept     | 3.9195   | 2.6215    | 0.1461  |
| Enrofloxacin  | -1.1526  | 0.5678    | 0.0520  |
| Florfenicol   | -1.5284  | 0.698     | 0.0370  |
| Trimethoprim* | -0.989   | 0.5514    | 0.0837  |

\*in combination with sulfadimidine

**S29 Table. Results of the logistic regression model for the presence of *C. difficile* (16s-rDNA gene) as the dependent variable in suckling piglets.**

| Variable          | Estimate | Std.Error | odds ratios | OR lower CI | OR upper CI | p-value |
|-------------------|----------|-----------|-------------|-------------|-------------|---------|
| Intercept         | 0.489    | 0.1822    | 1.6306      | 1.1409      | 2.3306      | 0.0072  |
| Benzylpenicillin* | 1.6493   | 0.5305    | 5.2035      | 1.8394      | 14.72       | 0.0018  |
| Tulathromycin     | 1.6045   | 0.6989    | 4.9755      | 1.2645      | 19.5773     | 0.0216  |

\*in combination with streptomycin

**S30 Table. Results of the beta linear regression model for the concentration of *C. difficile* (16s-rDNA gene) as the dependent variable in suckling piglets.**

| Variable    | Estimate | Std.Error | p-value |
|-------------|----------|-----------|---------|
| Intercept   | 3.4447   | 1.7396    | 0.0497  |
| Amoxicillin | 0.3035   | 0.1563    | 0.0543  |
| Ceftiofur   | -0.3082  | 0.219     | 0.1617  |
| Gentamycin  | 0.7732   | 0.3286    | 0.0200  |

**S31 Table. Results of the logistic regression model for the presence of *Escherichia/Shigella/Hafnia* as the dependent variable in suckling piglets.**

| Variable     | Estimate | Std.Error | odds ratios | OR lower CI | OR upper CI | p-value |
|--------------|----------|-----------|-------------|-------------|-------------|---------|
| Intercept    | -8.8981  | 2.408     | 0.0002      | 0           | 0.0276      | 0.0004  |
| int1         | 1.2784   | 0.2946    | 3.3226      | 1.8653      | 5.9185      | <0.001  |
| Amoxicillin  | 1.6578   | 0.7705    | 5.2475      | 1.159       | 23.7589     | 0.0314  |
| Enrofloxacin | 1.1468   | 0.9179    | 3.148       | 0.5287      | 19.0255     | 0.2115  |

**S32 Table. Results of the beta linear regression model for the concentration of *Escherichia/Shigella/Hafnia* as the dependent variable in suckling piglets.**

| Variable     | Estimate | Std.Error | p-value |
|--------------|----------|-----------|---------|
| Intercept    | -8.2237  | 0.9944    | <0.001  |
| int1         | 0.7958   | 0.0947    | <0.001  |
| Amoxicillin  | 0.348    | 0.1384    | 0.0128  |
| Colistin     | -1.1254  | 0.3233    | 0.0006  |
| Enrofloxacin | -0.4624  | 0.1461    | 0.0018  |
| Gentamycin   | -0.5051  | 0.2793    | 0.0723  |

**S33 Table. Results of the logistic regression model for the presence of *E. coli* F6 fimbriae (*fae*) as the dependent variable in suckling piglets.**

| Variable    | Estimate | Std.Error | odds ratios | OR lower CI | OR upper CI | p-value |
|-------------|----------|-----------|-------------|-------------|-------------|---------|
| Intercept   | -1.5198  | 0.4173    | 0.2187      | 0.0965      | 0.4955      | 0.0002  |
| Amoxicillin | 1.6753   | 0.7876    | 5.3405      | 1.1406      | 25.0041     | 0.0334  |
| Ceftiofur   | -1.9917  | 0.8301    | 0.1364      | 0.0268      | 0.6943      | 0.0164  |
| Colistin    | 1.6131   | 0.7453    | 5.0181      | 1.1645      | 21.6231     | 0.0304  |

**S34 Table. Results of the beta linear regression model for the concentration of *C. difficile* (16s-rDNA gene) as the dependent variable in weaned piglets.**

| Variable           | Estimate | Std.Error | p-value |
|--------------------|----------|-----------|---------|
| Intercept          | 3.3895   | 2.0177    | 0.0975  |
| Amoxicillin        | -0.7446  | 0.2266    | 0.0016  |
| Amoxicillin (oral) | 0.4218   | 0.1945    | 0.0336  |

**S35 Table. Results of the logistic regression model for the presence of *C. perfringens* (*cpa*) as the dependent variable in weaned piglets.**

| Variable           | Estimate | Std.Error | odds ratios | OR lower CI | OR upper CI | p-value |
|--------------------|----------|-----------|-------------|-------------|-------------|---------|
| Intercept          | 1.6011   | 0.2984    | 4.9583      | 2.7624      | 8.8996      | <0.001  |
| Amoxicillin (oral) | -0.8641  | 0.3684    | 0.4214      | 0.2047      | 0.8676      | 0.0190  |
| Colistin (oral)    | -1.1956  | 0.5453    | 0.3025      | 0.1038      | 0.8809      | 0.0284  |
| Enrofloxacin       | -0.9702  | 0.4061    | 0.3789      | 0.1709      | 0.84        | 0.0169  |
| Oxytetracycline    | -1.6011  | 0.6993    | 0.2016      | 0.0512      | 0.7942      | 0.0221  |

**S36 Table. Results of the logistic regression model for the presence of *E. coli* F18 fimbriae (*fedA*) as the dependent variable in weaned piglets.**

| Variable           | Estimate | Std.Error | odds ratios | OR lower CI | OR upper CI | p-value |
|--------------------|----------|-----------|-------------|-------------|-------------|---------|
| Intercept          | -0.7419  | 0.2454    | 0.4762      | 0.2944      | 0.7703      | 0.0024  |
| Amoxicillin        | -1.2955  | 0.3628    | 0.2737      | 0.1344      | 0.5574      | 0.0003  |
| Doxycycline (oral) | 1.3251   | 0.4441    | 3.7625      | 1.5757      | 8.984       | 0.0028  |

**S37 Table. Results of the logistic regression model for the presence of *E. coli* F6 fimbriae (*fae*) as the dependent variable in weaned piglets.**

| Variable            | Estimate | Std.Error | odds ratios | OR lower CI | OR upper CI | p-value |
|---------------------|----------|-----------|-------------|-------------|-------------|---------|
| Intercept           | -7.7639  | 1.3349    | 0.0004      | 0           | 0.0058      | <0.001  |
| int1                | 0.9394   | 0.1729    | 2.5585      | 1.8233      | 3.5902      | <0.001  |
| Doxycycline (oral)  | 0.9768   | 0.46      | 2.656       | 1.0781      | 6.5431      | 0.0337  |
| Enrofloxacin (oral) | 0.8049   | 0.4125    | 2.2365      | 0.9964      | 5.0199      | 0.0510  |

**S38 Table. Results of the linear regression model for the concentration of *E. coli* F6 fimbriae (*fae*) as the dependent variable in weaned piglets.**

| Variable   | Estimate | Std.Error | p-value |
|------------|----------|-----------|---------|
| Intercept  | -1.4074  | 1.3648    | 0.3058  |
| int1       | 0.9478   | 0.169     | <0.001  |
| Cefquinome | 0.7741   | 0.3965    | 0.0546  |

**S39 Table. Amount of administered antibiotic agents in different farms and animal groups during the sampling period.**

| Farm | No. of reproductive sows | Antibiotic agent         | Sows (mg) | Suckling piglets (mg) | Weaner (mg) |
|------|--------------------------|--------------------------|-----------|-----------------------|-------------|
| A    | 160                      | Amoxicillin oral         | 0         | 0                     | 400000      |
|      |                          | Cefquinom                | 0         | 2500                  | 2500        |
|      |                          | Ceftiofur                | 0         | 10000                 | 0           |
|      |                          | Florfenicol              | 30000     | 0                     | 0           |
| B    | 500                      | Amoxicillin              | 75000     | 135000                | 0           |
|      |                          | Cefquinom                | 0         | 0                     | 2500        |
|      |                          | Enrofloxacin             | 10000     | 0                     | 0           |
|      |                          | Sulfonamid Trimethroprim | 96000     | 0                     | 0           |
| C    | 140                      |                          | 0         | 0                     | 0           |
| D    | 240                      | Penicillin Streptomycin  | 0         | 44062                 | 0           |
| E    | 340                      | Amoxicillin              | 15000     | 0                     | 0           |
|      |                          | Amoxicillin oral         | 1000000   | 0                     | 0           |
|      |                          | Florfenicol              | 0         | 30000                 | 0           |
|      |                          | Oxytetracycline          | 0         | 40000                 | 80000       |
|      |                          | Penicillin Streptomycin  | 0         | 66093                 | 0           |
|      |                          | Sulfonamid Trimethroprim | 0         | 24000                 | 1440000     |
|      |                          | Tilmicosin               | 0         | 0                     | 3200000     |
|      |                          | Tulathromycin            | 0         | 15000                 | 0           |
| F    | 350                      | Amoxicillin              | 37500     | 75000                 | 81300       |
|      |                          | Amoxicillin oral         | 0         | 0                     | 3000000     |
|      |                          | Doxycyclin               | 0         | 0                     | 500000      |
|      |                          | Enrofloxacin             | 0         | 5000                  | 0           |
|      |                          | Tulathromycin            | 0         | 25000                 | 0           |
|      |                          | Tylosin                  | 154000    | 0                     | 0           |
| G    | 160                      | Amoxicillin              | 0         | 30000                 | 0           |
|      |                          | Enrofloxacin             | 2500      | 0                     | 0           |
|      |                          | Lincomycin               | 11340     | 0                     | 0           |
| H    | 210                      | Amoxicillin              | 0         | 0                     | 900         |
|      |                          | Amoxicillin oral         | 0         | 0                     | 1000000     |
|      |                          | Enrofloxacin             | 10000     | 0                     | 0           |
| I    | 450                      | Amoxicillin              | 165000    | 15000                 | 25500       |
|      |                          | Amoxicillin oral         | 0         | 0                     | 1000000     |
|      |                          | Sulfonamid Trimethroprim | 120000    | 0                     | 0           |

|   |      |                         |         |        |          |
|---|------|-------------------------|---------|--------|----------|
|   |      | Tulathromycin           | 0       | 15000  | 0        |
| J | 240  | Amoxicillin             | 15000   | 90000  | 30000    |
|   |      | Amoxicillin oral        | 0       | 0      | 1000000  |
|   |      | Enrofloxacin            | 0       | 5000   | 5000     |
|   |      | Penicillin Streptomycin | 60000   | 0      | 0        |
|   |      | Sulfonamid Trimethoprim | 192000  | 0      | 0        |
| K | 200  | Amoxicillin             | 225000  | 0      | 0        |
|   |      | Colistin                | 0       | 0      | 240000   |
|   |      | Florfenicol             | 60000   | 0      | 0        |
|   |      | Gentamycin              | 0       | 8500   | 0        |
|   |      | Penicillin Streptomycin | 0       | 22031  | 0        |
| L | 260  | Amoxicillin             | 0       | 0      | 15000    |
|   |      | Enrofloxacin            | 0       | 0      | 2500     |
|   |      | Penicillin Streptomycin | 0       | 44062  | 0        |
|   |      | Sulfonamid Trimethoprim | 24000   | 0      | 0        |
| M | 340  | Amoxicillin             | 37500   | 96300  | 30000    |
|   |      | Amoxicillin oral        | 1000000 | 0      | 0        |
|   |      | Colistin                | 0       | 0      | 360000   |
|   |      | Doxycycline oral        | 0       | 0      | 250000   |
|   |      | Enrofloxacin            | 0       | 2500   | 0        |
|   |      | Lincomycin              | 11340   | 0      | 0        |
|   |      | Lincomycin oral         | 0       | 0      | 200000   |
|   |      | Sulfonamid Trimethoprim | 0       | 0      | 720000   |
| N | 200  | Amoxicillin             | 30000   | 30000  | 62100    |
|   |      | Enrofloxacin            | 12500   | 0      | 5000     |
|   |      | Lincomycin              | 11340   | 0      |          |
| O | 120  | Amoxicillin             | 0       | 0      | 48000    |
| P | 260  | Amoxicillin             | 37500   | 0      | 21300    |
|   |      | Enrofloxacin            | 40000   | 0      | 2500     |
|   |      | Neomycin oral           | 1000000 | 0      | 1000000  |
|   |      | Tilmicosin oral         | 600000  | 0      | 400000   |
|   |      | Tulathromycin           | 15000   | 0      | 0        |
| Q | 280  | Amoxicillin             | 0       | 30000  | 37500    |
|   |      | Ceftiofur               | 0       | 0      | 10000    |
|   |      | Colistin                | 0       | 8000   | 6000     |
|   |      | Florfenicol             | 30000   | 0      | 0        |
| R | 200  | Amoxicillin             | 52500   | 0      | 0        |
|   |      | Amoxicillin oral        | 0       | 0      | 2000000  |
|   |      | Doxycycline oral        | 0       | 0      | 1500000  |
|   |      | Enrofloxacin            | 5000    | 15000  | 0        |
|   |      | Tildipirosin            |         | 20000  | 8000     |
| S | 280  | Amoxicillin             | 120000  | 0      | 4500     |
|   |      | Enrofloxacin            | 0       | 5000   | 0        |
|   |      | Penicillin Streptomycin | 0       | 22031  | 0        |
|   |      | Sulfonamid Trimethoprim | 48000   | 0      | 0        |
| T | 1200 | Amoxicillin             | 0       | 255000 | 525000   |
|   |      | Amoxicillin oral        | 0       |        | 10000000 |
|   |      | Enrofloxacin            | 0       | 10000  | 0        |
|   |      | Florfenicol             | 360000  | 0      | 0        |



|                         |        |   |        |
|-------------------------|--------|---|--------|
| Lincomycin              | 0      | 0 | 317520 |
| Sulfonamid Trimethoprim | 900000 | 0 | 0      |

---
